# Supplementary material for: Development of a multifunctional TiO2/MWCNT hybrid composite grafted on a stainless steel grating
Source: Royal Society of Chemistry journal article supplement (doi:10.1039/c5ra15003e), 2015-01-01
Supplement: c5ra15003e1.pdf [file c5ra15003e1.pdf]

## Development of multifunctional TiO<sub>2</sub>/MWCNT hybrid composite grafted on stainless-steel grating.

*Sara Cravanzola<sup>a</sup>, Sagar M. Jain<sup>a,b</sup>, Federico Cesano<sup>a\*</sup>, Alessandro Damin<sup>a</sup> and Domenica Scarano<sup>a</sup>*

<sup>a</sup> Department of Chemistry, NIS (Nanostructured Interfaces and Surfaces) Interdepartmental Centre and INSTM Centro Di Riferimento, University of Torino, Via P. Giuria, 7, 10125 Torino, Italy.

\*E-mail: federico.cesano@unito.it

<sup>b</sup> current address: sagarmjain@gmail.com.

### Electronic Supplementary Information (ESI).

The morphology and the chemical analysis of the stainless steel grating are reported in Fig. S1. From the EDAX spectrum the chemical composition (Fe 66wt%, Cr 17.9 wt%, Ni 8 wt%, Si ≈0.4wt%) is obtained. The steel exhibits excellent withstanding properties, from the strong corrosion resistance to a wide range of atmospheric and chemical compounds to the excellent oxidation resistance (up to 900°C).

The BET surface area and the pore size distributions (PSDs) of the TiO<sub>2</sub>/MWCNTs hybrid structure (obtained from the stainless steel support) and of the pure TiO<sub>2</sub> material (prepared by the same sol-gel and calcinations methods), as obtained from volumetric N<sub>2</sub> adsorption/desorption isotherms are shown in Fig. S2a,b

In Fig. S3 the scheme of the structure of methylene blue along the three perpendicular directions is reported.

PL spectra of TiO<sub>2</sub>/MWCNTs/stainless steel composite and of the discrete TiO<sub>2</sub> nanoparticles, obtained by adopting the same sol-gel preparation and treated at the same temperature are reported in Fig. S4.

The evolution of the surface properties (from the hydrophobic type of the MWCNTs/steel composite to the hydrophilic type of the TiO<sub>2</sub>/MWCNTs/steel composite) is optically imaged in Fig. S5.

The quantities of TiO<sub>2</sub> and of MWCNTs of the composites have been obtained by means of the thermogravimetric profile upon isothermal oxidative conditions at 800°C (Fig. S6).

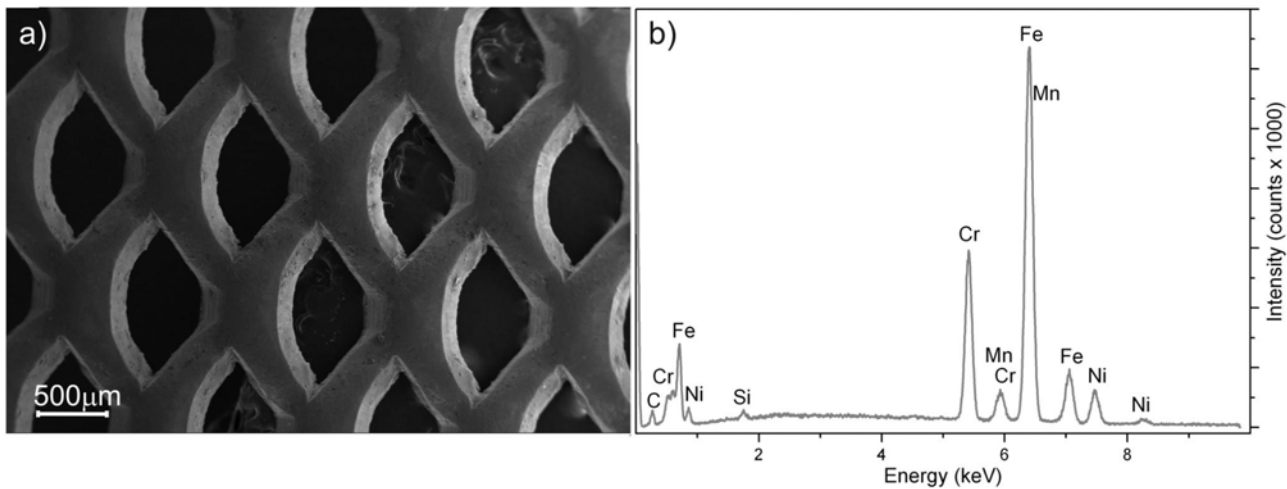

**Fig. S1.** A) SEM image and b) EDAX spectrum of the stainless steel grating used as a support.

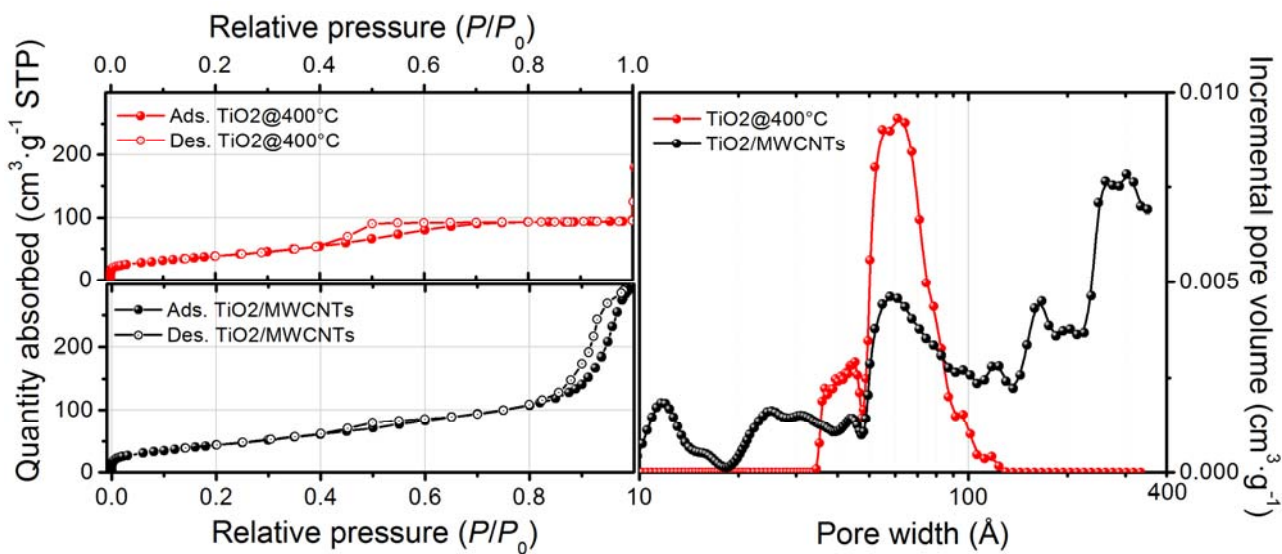

**Fig. S2.** N<sub>2</sub>-adsorption/desorption isotherms (left panels) and pore size distributions (right panel) of the TiO<sub>2</sub> obtained at 400°C in air and of the TiO<sub>2</sub>/MWCNT hybrid scaffold obtained from the stainless-steel support.

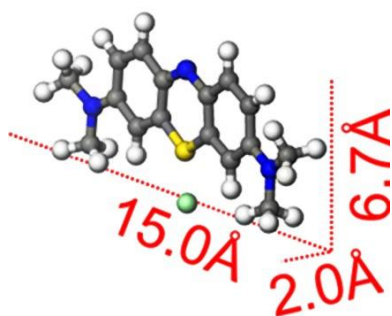

**Fig. S3.** Structure of methylene blue. The interatomic distances are reported along the three perpendicular directions.

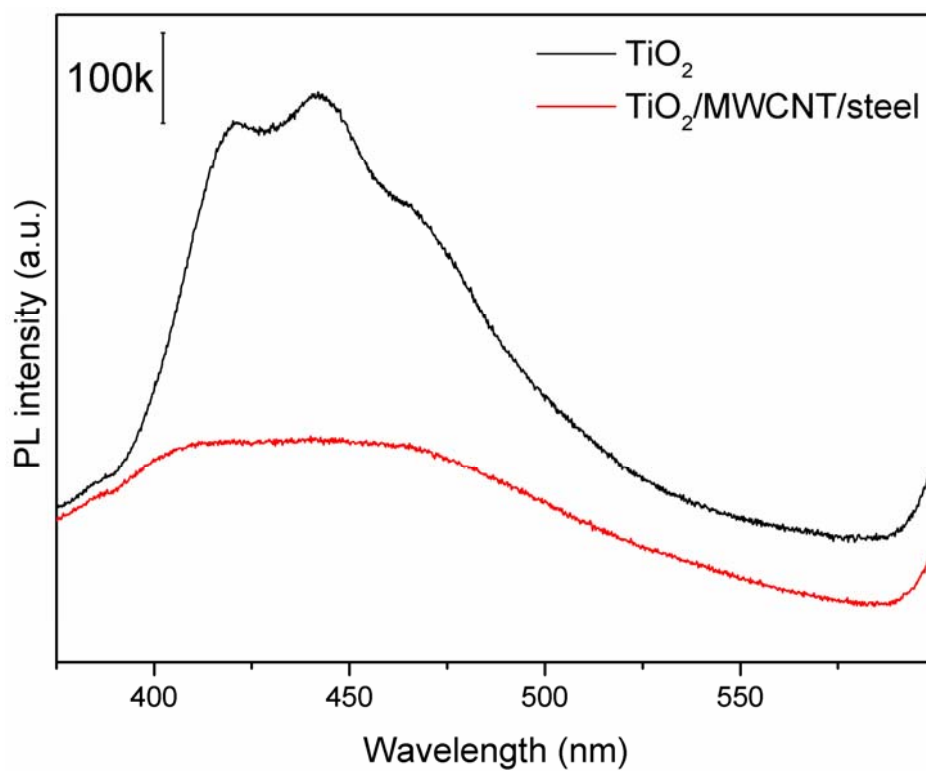

**Fig. S4.** PL emission spectra of TiO<sub>2</sub>/MWCNTs/steel composite and of TiO<sub>2</sub> reference material (P25).

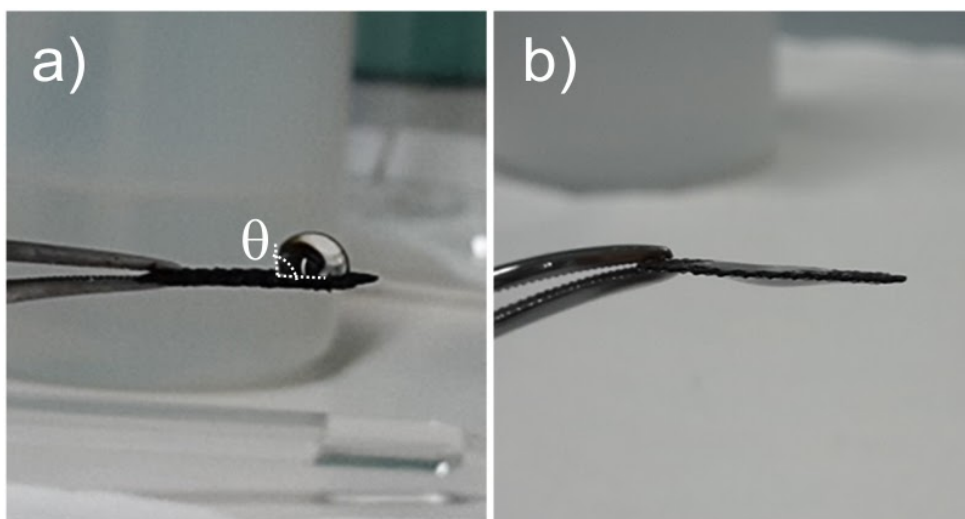

**Fig. S5.** Optical images showing the evolution of the surface properties (from hydrophobic type to hydrophilic type) of: a) the stainless steel grating covered by catalytically grown MWCNTs; and b) the same MWCNTs/steel composite coated with  $\text{TiO}_2$ .

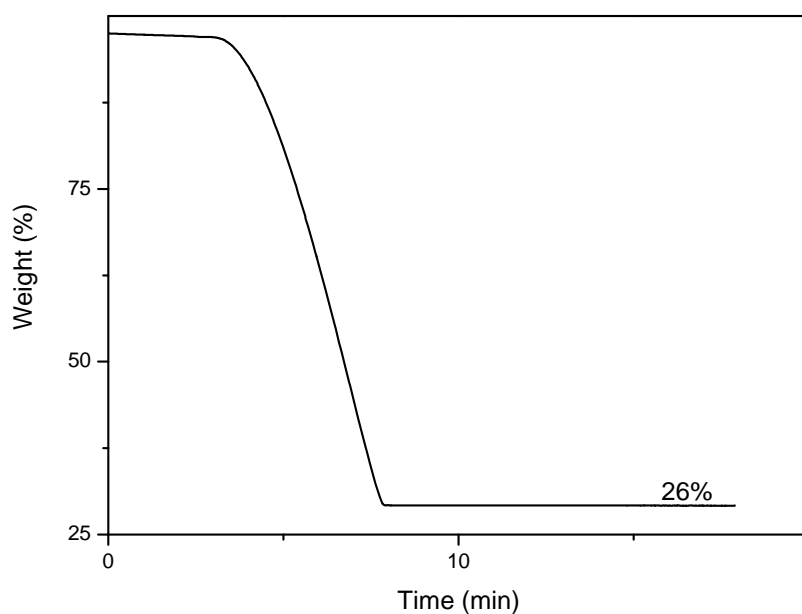

**Fig. S6.** Thermogravimetric profile of the  $\text{TiO}_2$ /MWCNTs/stainless steel grid under isothermal treatment at  $800^\circ\text{C}$  in air, after the heating in  $\text{N}_2$  (ramp, stage 1).
